# Supplementary material for: The Burden of Gastric Cancer Attributable to High Sodium Intake: A Longitudinal Study from 1990 to 2019 in China
Source: MDPI journal article supplement (doi:10.3390/nu15245088), 2023-12-13
Supplement: s1 [file s1]

*Supplementary Table S1.* Deaths and ASMR of gastric cancer disease attributable-high sodium intake in 1990 and 2019 and the temporal trends from 1990-2019.

| Characteristics | 1990                          |                                 | 2019                          |                                  | 1990-2019            |                                 |
|-----------------|-------------------------------|---------------------------------|-------------------------------|----------------------------------|----------------------|---------------------------------|
|                 | Deaths cases,<br>No. (95% UI) | ASMR per<br>100,000 No.(95% UI) | Deaths cases,<br>No. (95% UI) | ASMR per<br>100,000 No. (95% UI) | PAFs %<br>(95% UI)   | EAPC(%) in<br>ASMR No. (95% CI) |
| <b>Region</b>   |                               |                                 |                               |                                  |                      |                                 |
| Anhui           | 2146.88 (46.72 to 7905.63)    | 5.49 (0.12 to 20.37)            | 2620.63 (55.77 to 9898)       | 2.87 (0.06 to 10.85)             | 8.89 (0.21 to 33.04) | -2.03 (-2.44 to -1.63)          |
| Beijing         | 174.73 (3.86 to 651.83)       | 1.98 (0.04 to 7.31)             | 252.11 (5.41 to 921.33)       | 0.78 (0.02 to 2.85)              | 8.90 (0.21 to 32.91) | -3.32 (-3.41 to -3.23)          |
| Chongqing       | 278.69 (6.04 to 1032.87)      | 2.36 (0.05 to 8.71)             | 643.60 (13.83 to 2461.93)     | 1.52 (0.03 to 5.85)              | 8.69 (0.21 to 32.50) | -1.14 (-1.54 to -0.74)          |
| Fujian          | 1042.99 (22.75 to 3940.85)    | 5.22 (0.12 to 19.57)            | 1234.75 (26.77 to 4643.99)    | 2.47 (0.05 to 9.31)              | 8.81(0.21 to 32.80)  | -2.63 (-2.72 to -2.54)          |
| Gansu           | 612.58 (14.23 to 2391.08)     | 4.46 (0.11 to 17.82)            | 975.81 (22.56 to 3759.51)     | 2.84 (0.07 to 10.99)             | 8.04 (0.21 to 31.41) | -1.44 (-1.89 to -0.98)          |
| Guangdong       | 890.53 (19.77 to 3437.91)     | 1.98 (0.04 to 7.65)             | 1215.51 (27.48 to 4638.79)    | 0.93 (0.02 to 3.55)              | 8.59 (0.21 to 32.40) | -2.23 (-2.68 to -1.77)          |
| Guangxi         | 621.23 (13.68 to 2397.13)     | 2.17 (0.05 to 8.51)             | 1003.72 (22.01 to 3781.63)    | 1.63 (0.04 to 6.17)              | 8.46 (0.21 to 32.10) | -0.38 (-0.83 to 0.07)           |
| Guizhou         | 413.55 (9.05 to 1525.41)      | 2.03 (0.05 to 7.56)             | 672.22 (14.67 to 2516.46)     | 1.57 (0.03 to 5.96)              | 8.68 (0.21 to 32.59) | -0.38 (-0.71 to -0.05)          |
| Hainan          | 160.62 (3.58 to 615.73)       | 3.60 (0.08 to 13.95)            | 256.92 (5.75 to 989.52)       | 2.30 (0.05 to 8.89)              | 8.42 (0.21 to 32.14) | -1.12 (-1.42 to -0.82)          |
| Hebei           | 1509.07 (33.34 to 5589.76)    | 3.41 (0.08 to 12.69)            | 2080.59 (44.65 to 7700.39)    | 2.04 (0.04 to 7.56)              | 8.83 (0.21 to 32.91) | -1.63 (-2.09 to -1.18)          |
| Heilongjiang    | 589.98 (13.10 to 2252.24)     | 2.98 (0.07 to 11.43)            | 929.05 (20.52 to 3481.43)     | 1.57 (0.04 to 6.02)              | 8.52 (0.21 to 32.26) | -1.76 (-2.05 to -1.46)          |

| Characteristics | 1990                          |                                 | 2019                          |                                  | 1990-2019            |                                 |
|-----------------|-------------------------------|---------------------------------|-------------------------------|----------------------------------|----------------------|---------------------------------|
|                 | Deaths cases,<br>No. (95% UI) | ASMR per<br>100,000 No.(95% UI) | Deaths cases,<br>No. (95% UI) | ASMR per<br>100,000 No. (95% UI) | PAFs %<br>(95% UI)   | EAPC(%) in<br>ASMR No. (95% CI) |
| Henan           | 2611.86 (57.8 to 9561.77)     | 4.28 (0.10 to 15.83)            | 2950.71 (64.73 to 10986.83)   | 2.41 (0.05 to 9.02)              | 8.79 (0.21 to 32.91) | -1.91 (-2.30 to -1.52)          |
| Hong Kong       | 81.96 (1.92 to 299.89)        | 1.49 (0.03 to 5.46)             | 107.24 (2.29 to 409.98)       | 0.72 (0.02 to 2.72)              | 8.79 (0.21 to 32.88) | -2.46 (-2.69 to -2.22)          |
| Hubei           | 1035.70 (23.33 to 3810.60)    | 2.77 (0.06 to 10.18)            | 1492.15 (32.15 to 5669.98)    | 1.73 (0.04 to 6.54)              | 8.72 (0.21 to 32.71) | -1.06 (-1.44 to -0.68)          |
| Hunan           | 762.78 (17.22 to 2820.83)     | 1.75 (0.04 to 6.47)             | 1132.43 (24.55 to 4254.50)    | 1.16 (0.03 to 4.36)              | 8.75 (0.21 to 32.69) | -0.96 (-1.25 to -0.66)          |
| Inner Mongolia  | 357.90 (7.78 to 1336.06)      | 2.86 (0.06 to 10.7)             | 574.57 (12.24 to 2104.58)     | 1.69 (0.04 to 6.19)              | 8.88 (0.21 to 32.98) | -1.73 (-2.08 to -1.38)          |
| Jiangsu         | 2330.12 (52.07 to 8597.48)    | 4.34 (0.10 to 16.1)             | 3034.31 (65.72 to 11195.55)   | 2.22 (0.05 to 8.17)              | 8.82 (0.21 to 32.89) | -2.14 (-2.65 to -1.62)          |
| Jiangxi         | 846.71 (18.73 to 3142.73)     | 3.45 (0.08 to 12.83)            | 1016.95 (21.67 to 3815.86)    | 1.80 (0.04 to 6.80)              | 8.89 (0.21 to 33.01) | -2.01 (-2.25 to -1.77)          |
| Jilin           | 468.81 (10.31 to 1808.05)     | 3.02 (0.07 to 11.66)            | 530.16 (11.84 to 1939.54)     | 1.25 (0.03 to 4.65)              | 8.75 (0.21 to 32.75) | -3.19 (-3.62 to -2.75)          |
| Liaoning        | 859.80 (19.15 to 3286.72)     | 3.08 (0.07 to 11.86)            | 1355.75 (29.84 to 5145.03)    | 1.76 (0.04 to 6.73)              | 8.59 (0.21 to 32.39) | -1.55 (-1.8 to -1.31)           |
| Macao           | 4.15 (0.09 to 15.17)          | 1.52 (0.03 to 5.52)             | 5.83 (0.12 to 22.49)          | 0.63 (0.01 to 2.42)              | 8.83 (0.21 to 32.97) | -3.14 (-3.34 to -2.95)          |
| Ningxia         | 113.15 (2.47 to 438.24)       | 4.82 (0.11 to 18.84)            | 243.82 (5.48 to 937.69)       | 3.41 (0.08 to 13.20)             | 8.44 (0.21 to 32.27) | -0.98 (-1.13 to -0.82)          |
| Qinghai         | 127.81 (2.69 to 476.30)       | 5.44 (0.12 to 20.04)            | 273.51 (5.83 to 1019.98)      | 4.36 (0.10 to 16.29)             | 8.88 (0.21 to 32.97) | -0.51 (-0.71 to -0.3)           |
| Shaanxi         | 796.28 (17.31 to 2954.11)     | 3.61 (0.08 to 13.51)            | 1044.35 (22.34 to 3865.56)    | 1.98 (0.04 to 7.39)              | 8.84 (0.21 to 32.83) | -1.94 (-2.31 to -1.58)          |

| Characteristics | 1990                          |                                 | 2019                          |                                  | 1990-2019            |                                 |
|-----------------|-------------------------------|---------------------------------|-------------------------------|----------------------------------|----------------------|---------------------------------|
|                 | Deaths cases,<br>No. (95% UI) | ASMR per<br>100,000 No.(95% UI) | Deaths cases,<br>No. (95% UI) | ASMR per<br>100,000 No. (95% UI) | PAFs %<br>(95% UI)   | EAPC(%) in<br>ASMR No. (95% CI) |
| Shandong        | 2363.43 (51.86 to 8795.77)    | 3.73 (0.08 to 14.01)            | 3543.69 (78.12 to 13024.72)   | 2.31 (0.05 to 8.52)              | 8.86 (0.21 to 32.97) | -1.35 (-1.88 to -0.82)          |
| Shanghai        | 492.02 (10.58 to 1852.30)     | 3.50 (0.08 to 13.27)            | 566.30 (12.04 to 2139.24)     | 1.34 (0.03 to 5.06)              | 8.70 (0.21 to 32.66) | -3.34 (-3.43 to -3.25)          |
| Shanxi          | 926.59 (20.74 to 3533.39)     | 4.64 (0.11 to 17.87)            | 1494.43 (32.86 to 5639.88)    | 3.16 (0.07 to 12.10)             | 8.59 (0.21 to 32.38) | -1.05 (-1.52 to -0.57)          |
| Sichuan         | 2491.59 (54.53 to 9295.86)    | 3.11 (0.07 to 11.65)            | 2747.61 (59.9 to 10112.62)    | 2.09 (0.05 to 7.76)              | 8.70 (0.21 to 32.57) | -1.14(-1.91 to -0.36)           |
| Tianjin         | 144.33 (3.25 to 539.00)       | 2.04 (0.05 to 7.69)             | 199.11 (4.28 to 773.61)       | 0.94 (0.02 to 3.63)              | 8.60 (0.21 to 32.48) | -2.49 (-2.67 to -2.32)          |
| Tibet           | 60.52 (1.32 to 228.81)        | 4.12 (0.09 to 15.49)            | 62.28 (1.31 to 227.56)        | 2.35 (0.05 to 8.60)              | 8.92 (0.21 to 32.95) | -2.13 (-2.37 to -1.89)          |
| Xinjiang        | 269.27 (5.72 to 1019.43)      | 3.19 (0.07 to 12.12)            | 559.31 (11.97 to 2077.37)     | 2.34 (0.05 to 8.76)              | 8.88 (0.21 to 32.84) | -0.75 (-0.96 to -0.54)          |
| Yunnan          | 385.05 (8.44 to 1452.29)      | 1.59 (0.04 to 6.00)             | 677.78 (14.8 to 2498.95)      | 1.24 (0.03 to 4.61)              | 8.71 (0.21 to 32.70) | -0.36 (-0.69 to -0.02)          |
| Zhejiang        | 1255.84 (27 to 4654.13)       | 3.68 (0.08 to 13.67)            | 1634.26 (34.75 to 5953.92)    | 1.85 (0.04 to 6.76)              | 9.00 (0.21 to 33.13) | -2.14 (-2.44 to -1.83)          |

ASMR=age-standardized mortality rate; PAF=population attributable fraction; EAPC=estimated annual percentage change.
